# Supplementary material for: Sea-ice variations and trends during the Common Era in the Atlantic sector of the Arctic Ocean
Source: Copernicus journal article supplement (doi:10.5194/tc-18-1399-2024), 2024-03-27
Supplement: Supplementary file 1 [file tc-18-1399-2024-supplement.pdf]

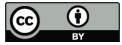

*Supplement of*

## **Sea-ice variations and trends during the Common Era in the Atlantic sector of the Arctic Ocean**

**Ana Lúcia Lindroth Dauner et al.**

*Correspondence to:* Ana Lúcia Lindroth Dauner ([ana.lindrothdauner@helsinki.fi](mailto:ana.lindrothdauner@helsinki.fi), [anadauner@gmail.com](mailto:anadauner@gmail.com))

The copyright of individual parts of the supplement might differ from the article licence.

# Figures

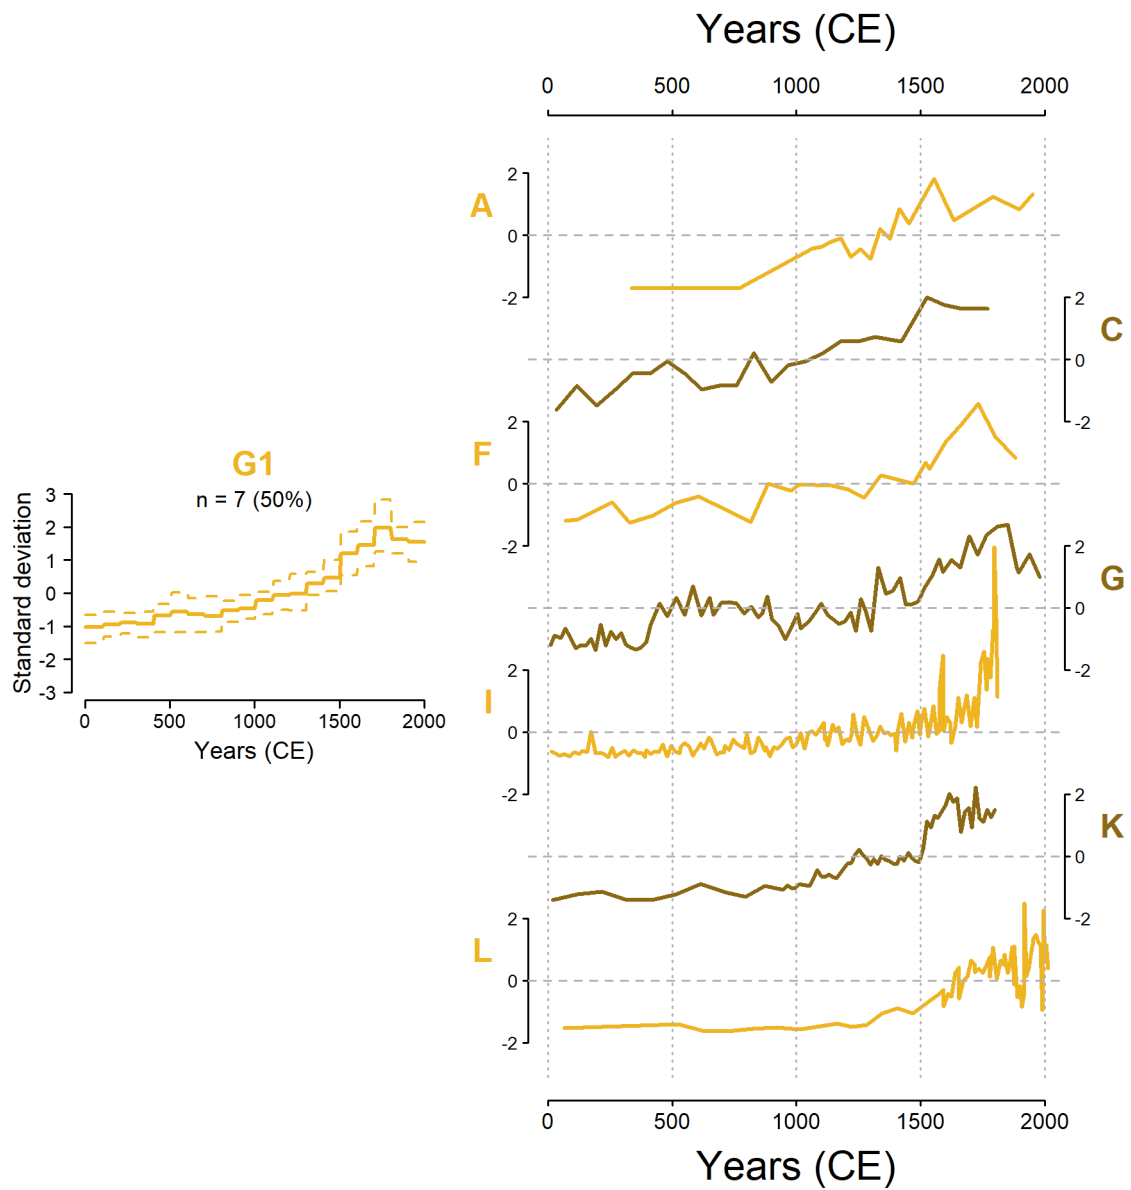

Figure S1. Original data from the records from Group 1 (cluster analysis after removing the global trend).

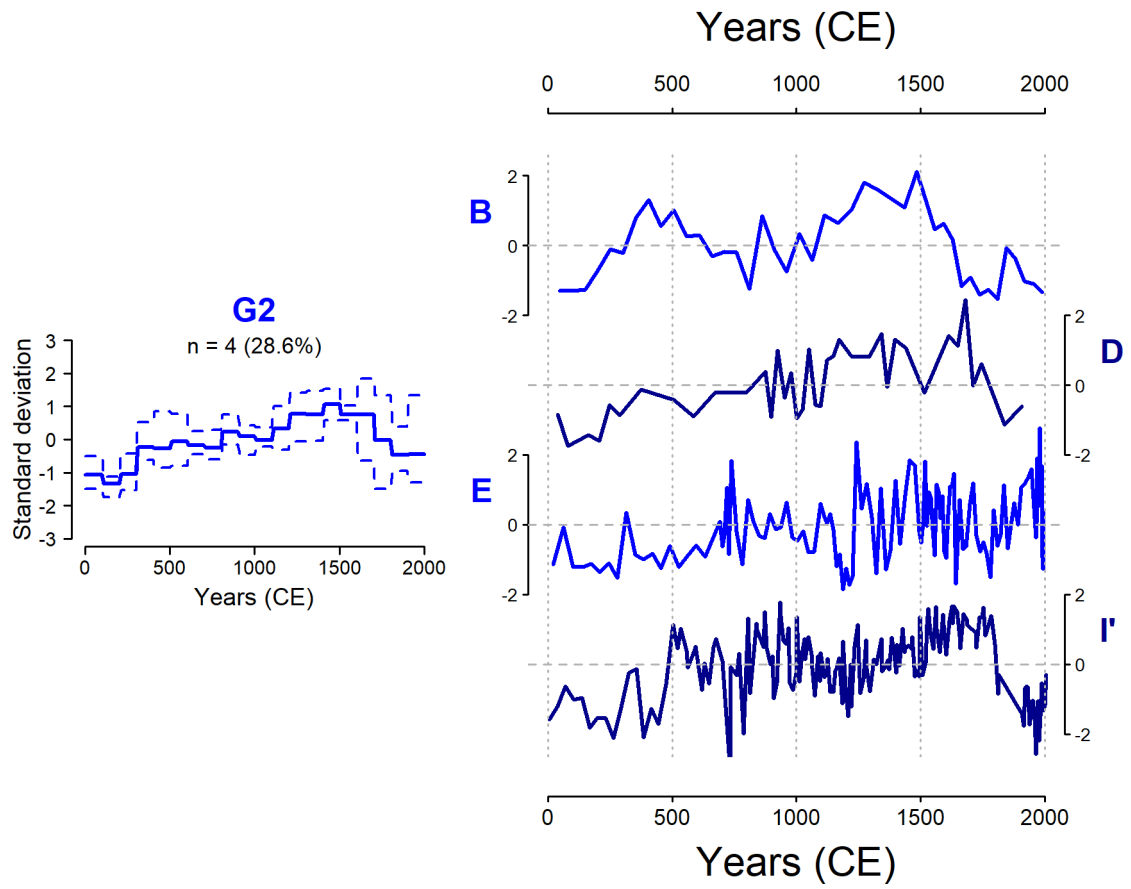

Figure S2. Original data from the records from Group 2 (cluster analysis after removing the global trend).

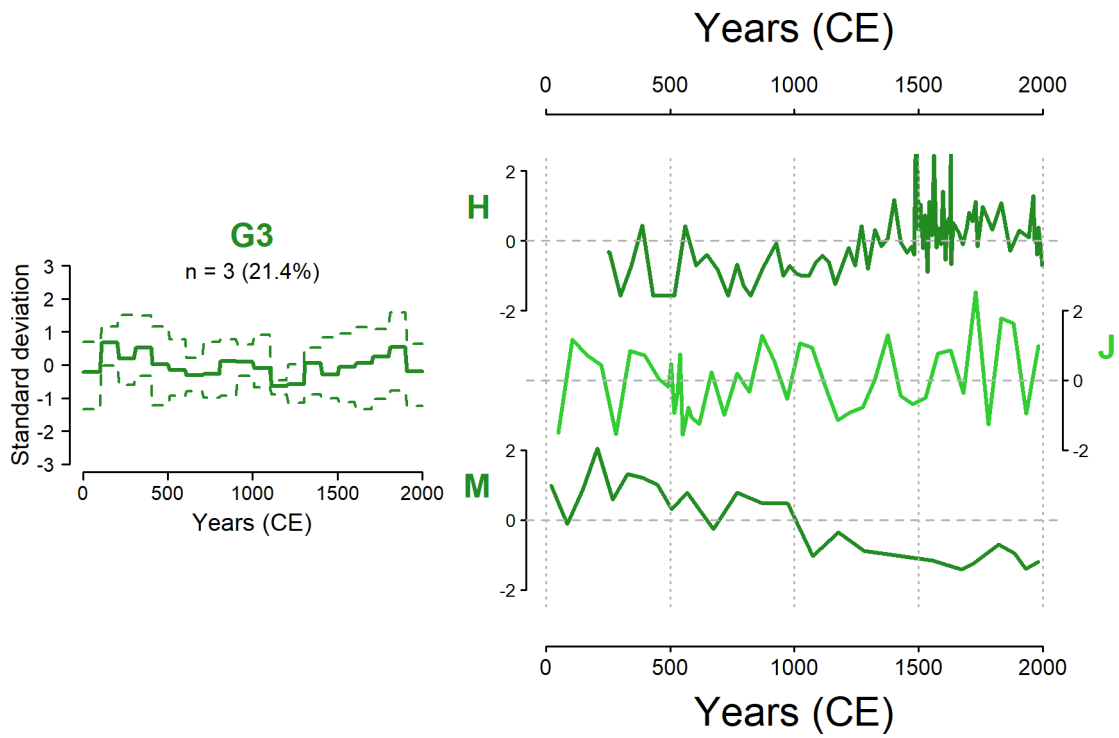

25

**Figure S3. Original data from the records from Group 3 (cluster analysis after removing the global trend).**

### McKay and Kaufman, 2014

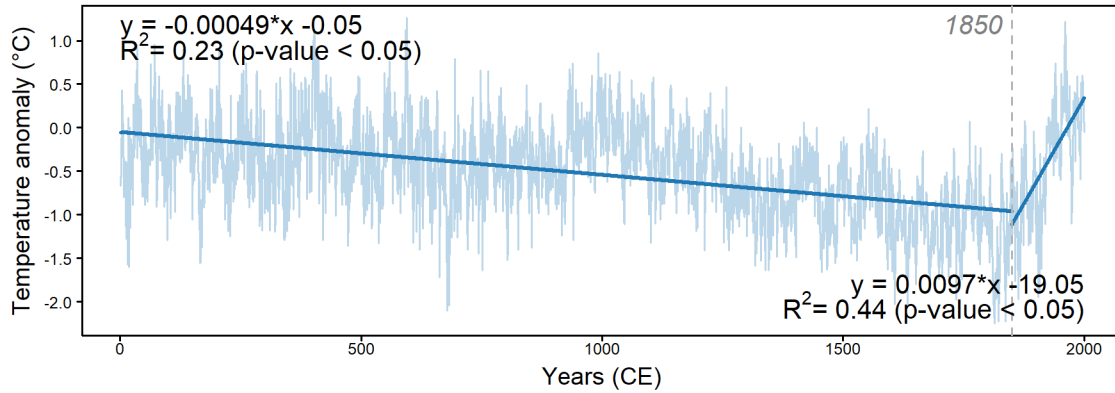

### CESM1

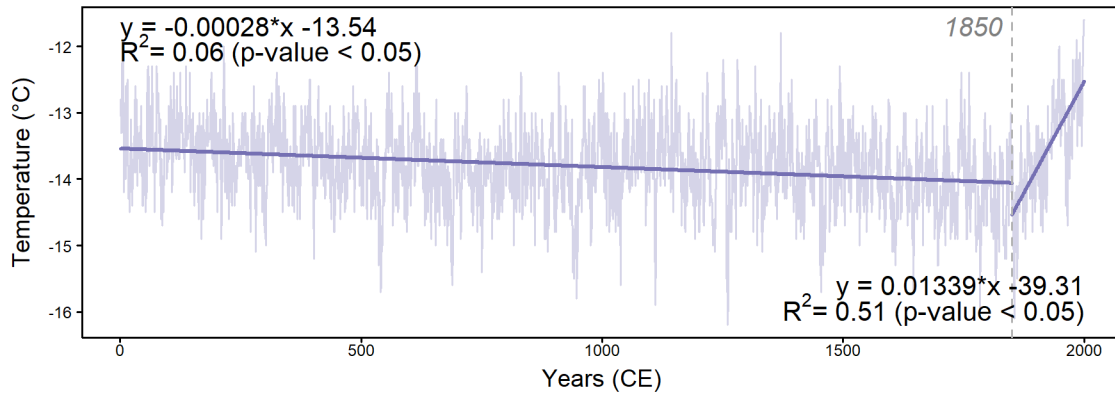

### MPI-ESM

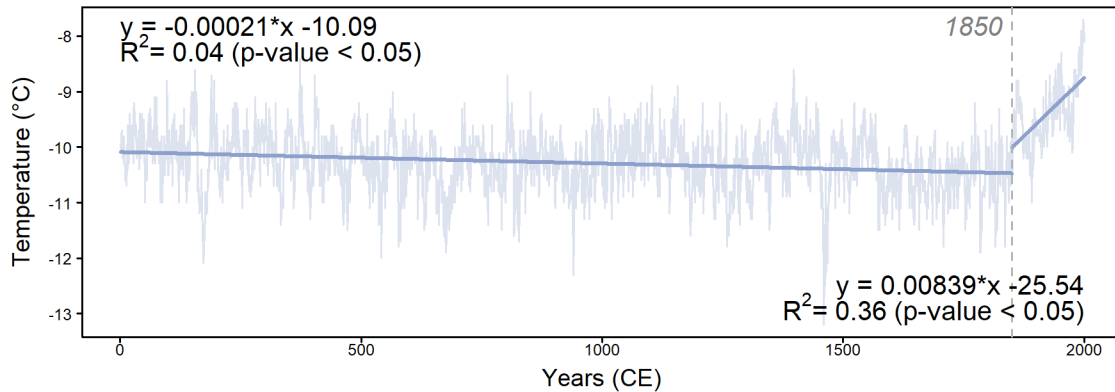

30 Figure S4. Arctic (latitudes > 60° N) air temperatures based on McKay and Kaufman (2014) and on numerical models CESM1 and MPI-ESM data.

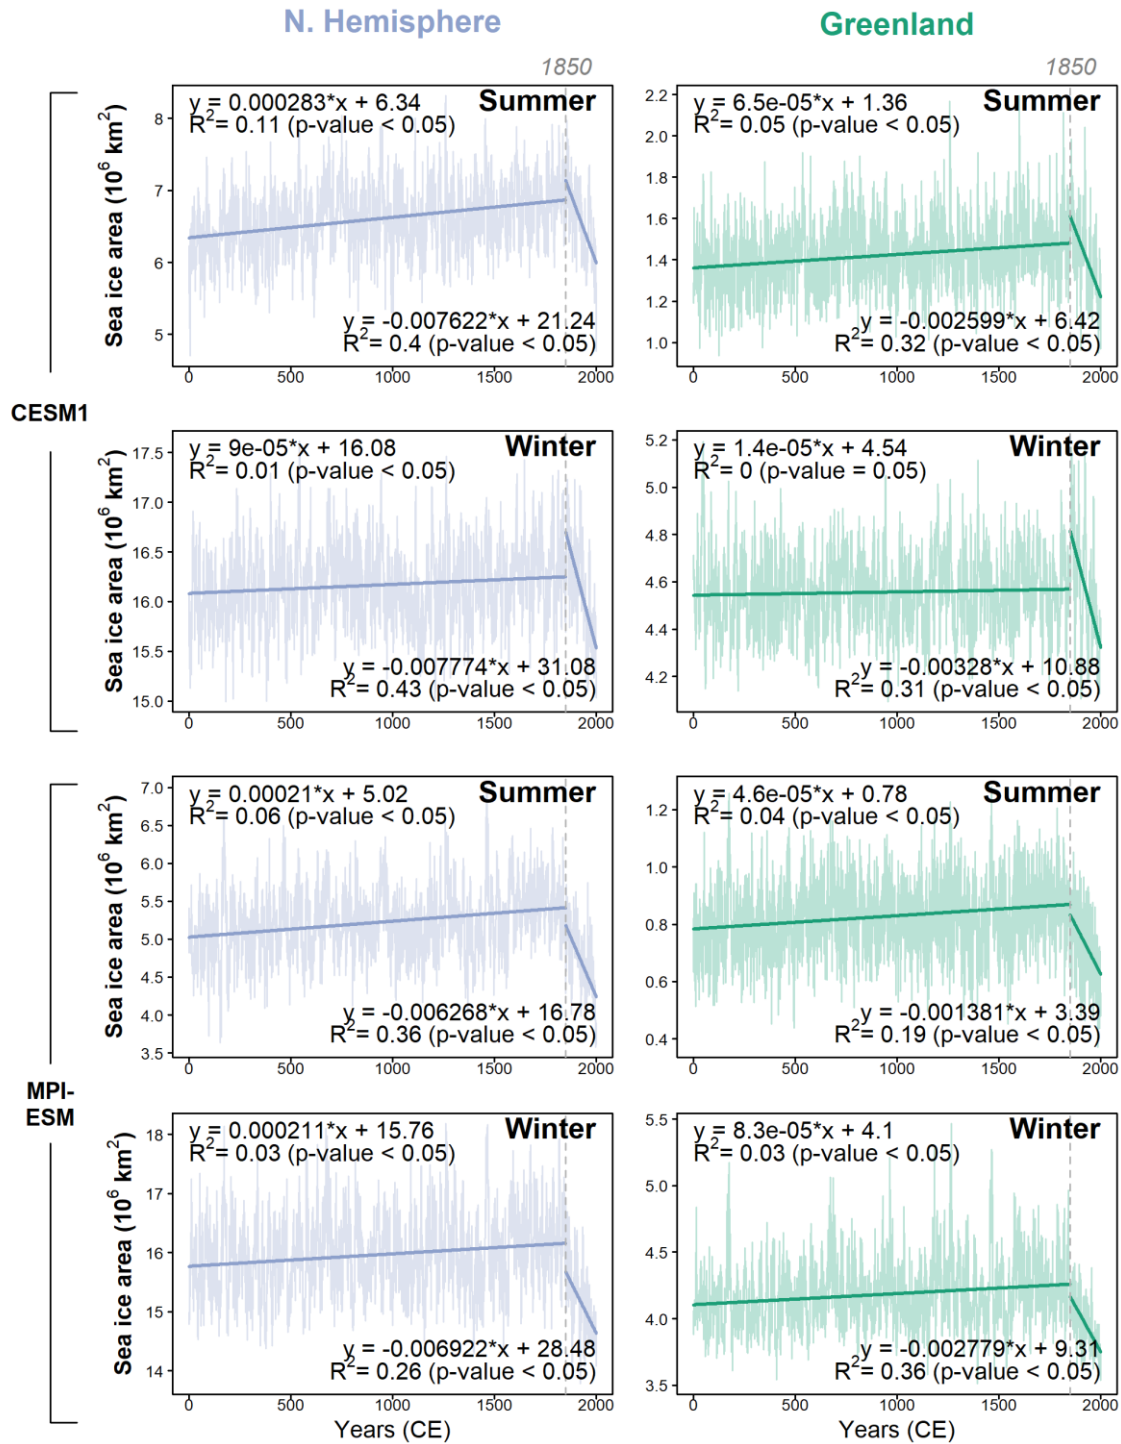

35 **Figure S5.** Sea-ice area trends based on numerical models CESM1 and MPI-ESM data, considering the Northern Hemisphere (left column) and region around Greenland (right column), and summer (minimum area) and winter (maximum area) seasons.

# CESM1

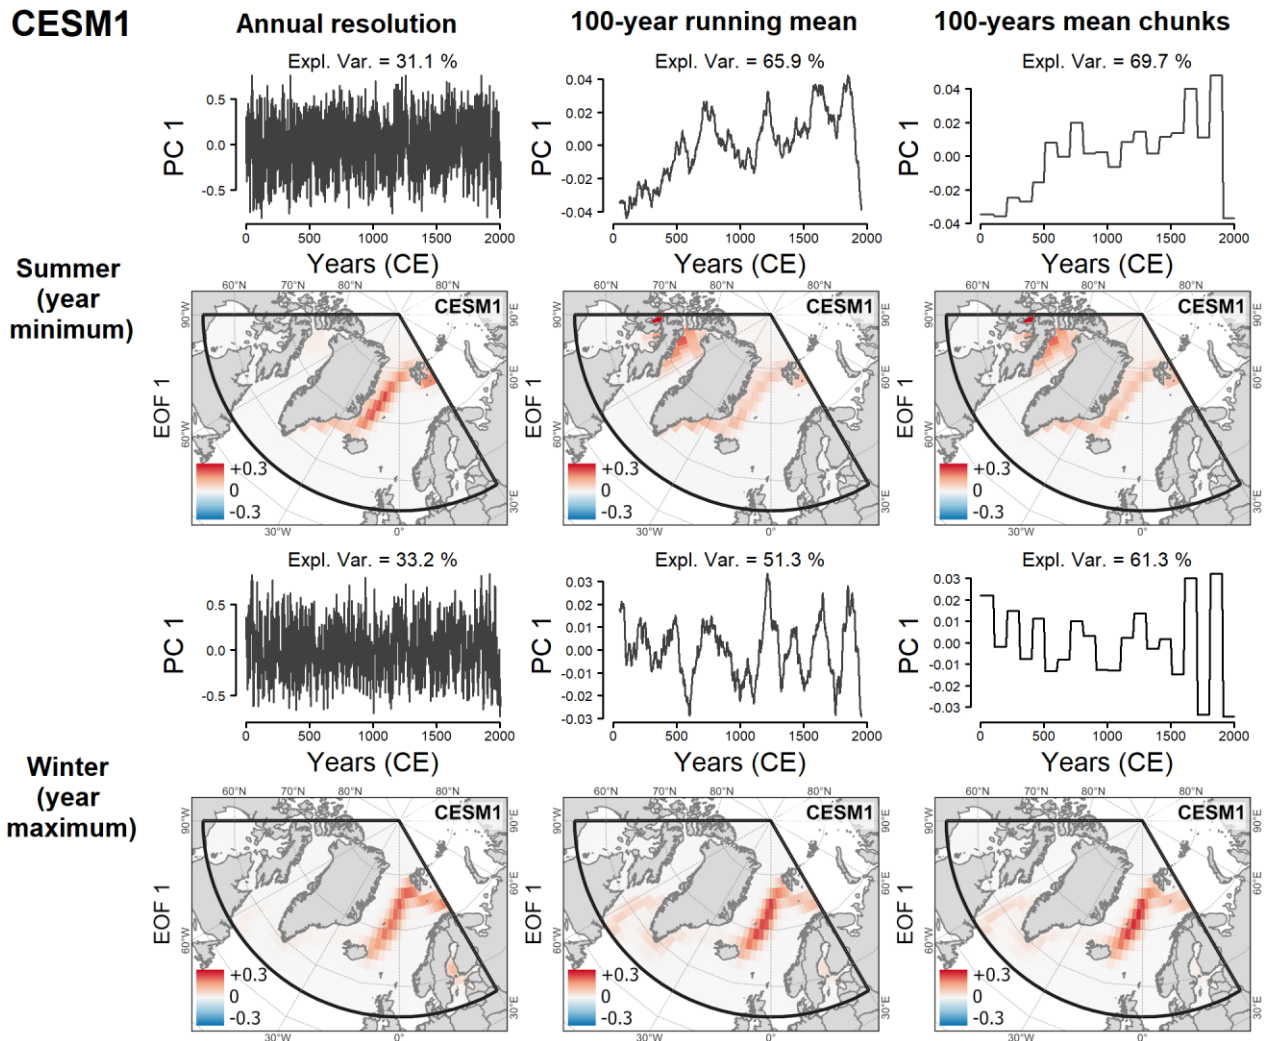

Figure S6. Results of empirical orthogonal function (EOF) analysis (PC1: normalized first principal component; EOF1: first EOF mode loadings) of the sea ice fraction based on CESM1 data, considering summer and winter seasons. First column: Data with annual resolution. Second column: 100-year running mean data. Third column: 100-years mean chunks data. The solid thick black line in the panels of the second and fourth rows represents the spatial domain used in the climate simulations.

40

# MPI-ESM

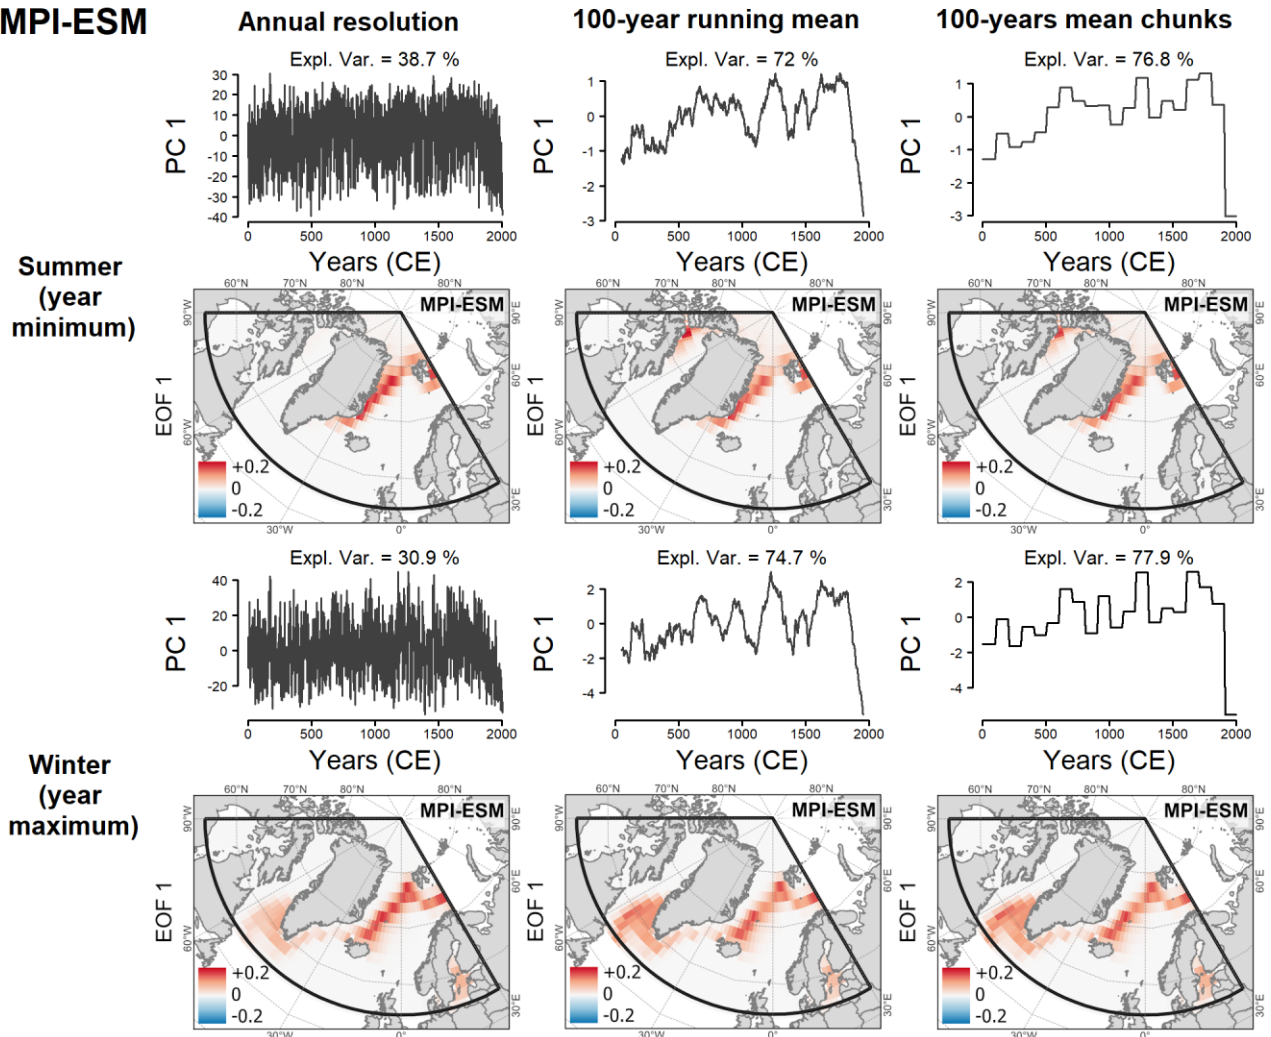

45 **Figure S7. Results of empirical orthogonal function (EOF) analysis (PC1: normalized first principal component; EOF1: first EOF mode loadings) of the sea ice fraction based on MPI-ESM data, considering summer and winter seasons. First column: Data with annual resolution. Second column: 100-year running mean data. Third column: 100-years mean chunks data. The solid thick black line in the panels of the second and fourth rows represents the spatial domain used in the climate simulations.**



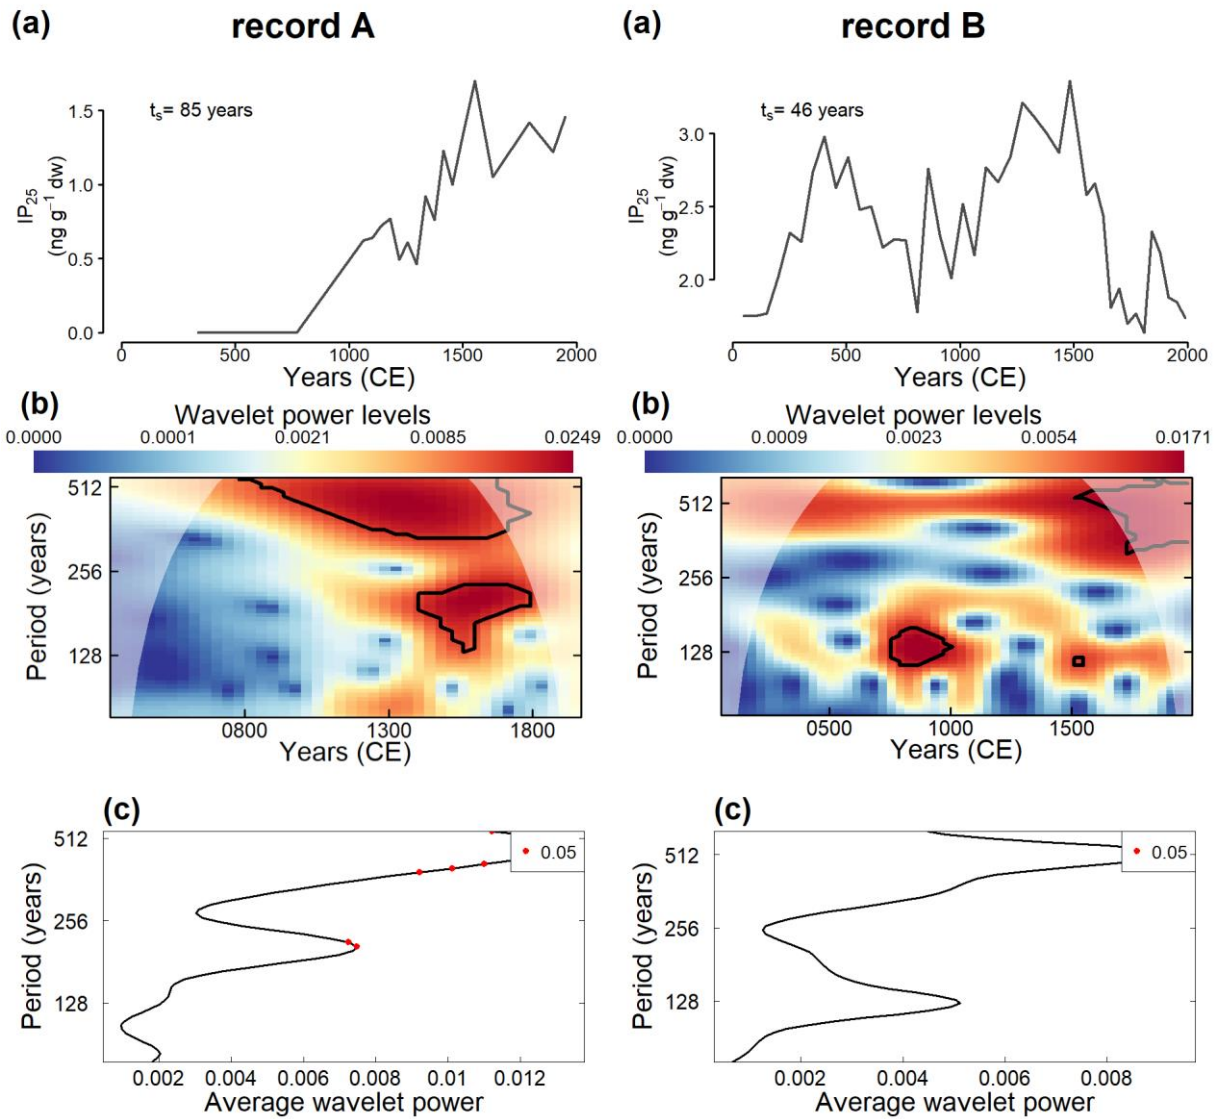

50

**Figure S8.** Wavelet analysis of sea ice reconstructions from records A and B. (a) Original time series with the average resolution. (b) Wavelet power spectrum and (c) global wavelet of the normalized signal on the time-frequency domain. Marked regions on the wavelet spectrum indicate significant power to a 95% confidence interval. The areas under the cone of influence show where edge effects are important.

55

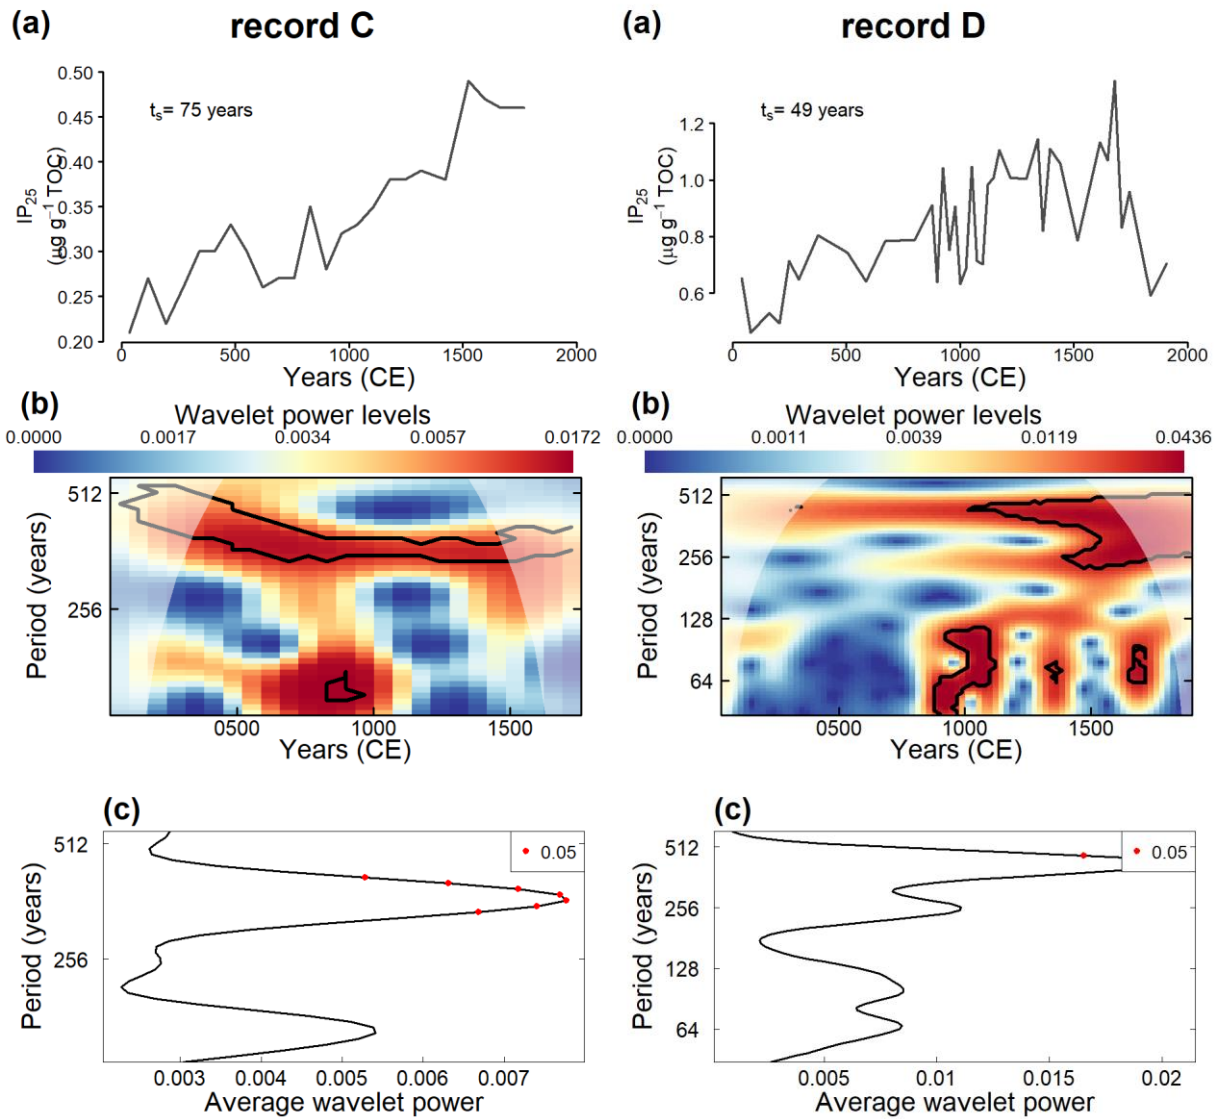

Figure S9. Wavelet analysis of sea ice reconstructions from records C and D. (a) Original time series with the average resolution. (b) Wavelet power spectrum and (c) global wavelet of the normalized signal on the time-frequency domain. Marked regions on the wavelet spectrum indicate significant power to a 95% confidence interval. The areas under the cone of influence show where edge effects are important.

60

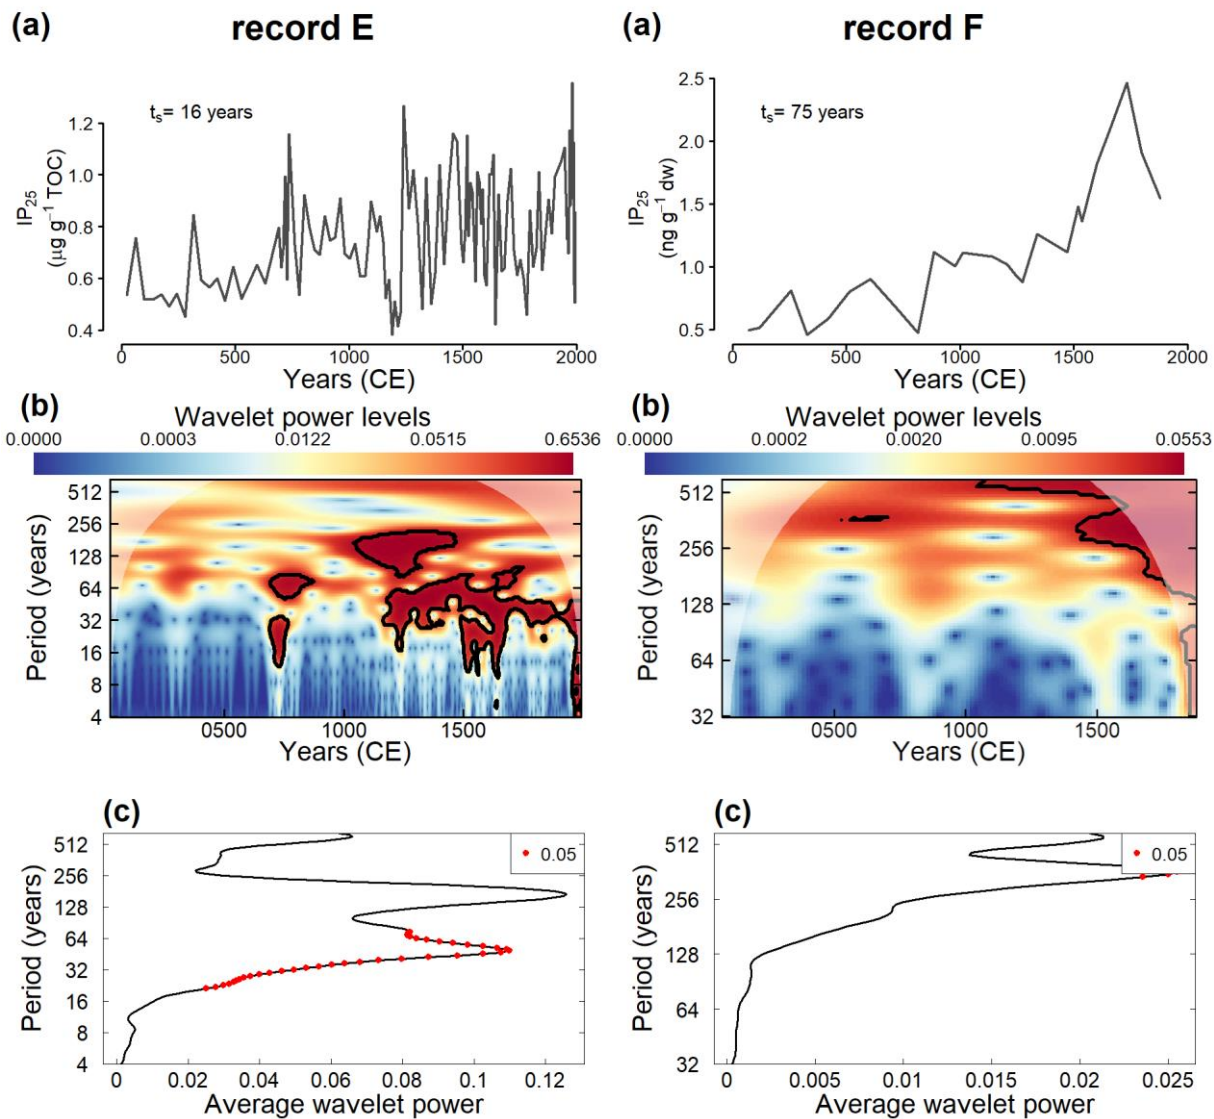

65 **Figure S10. Wavelet analysis of sea ice reconstructions from records E and F. (a) Original time series with the average resolution. (b) Wavelet power spectrum and (c) global wavelet of the normalized signal on the time-frequency domain. Marked regions on the wavelet spectrum indicate significant power to a 95% confidence interval. The areas under the cone of influence show where edge effects are important.**

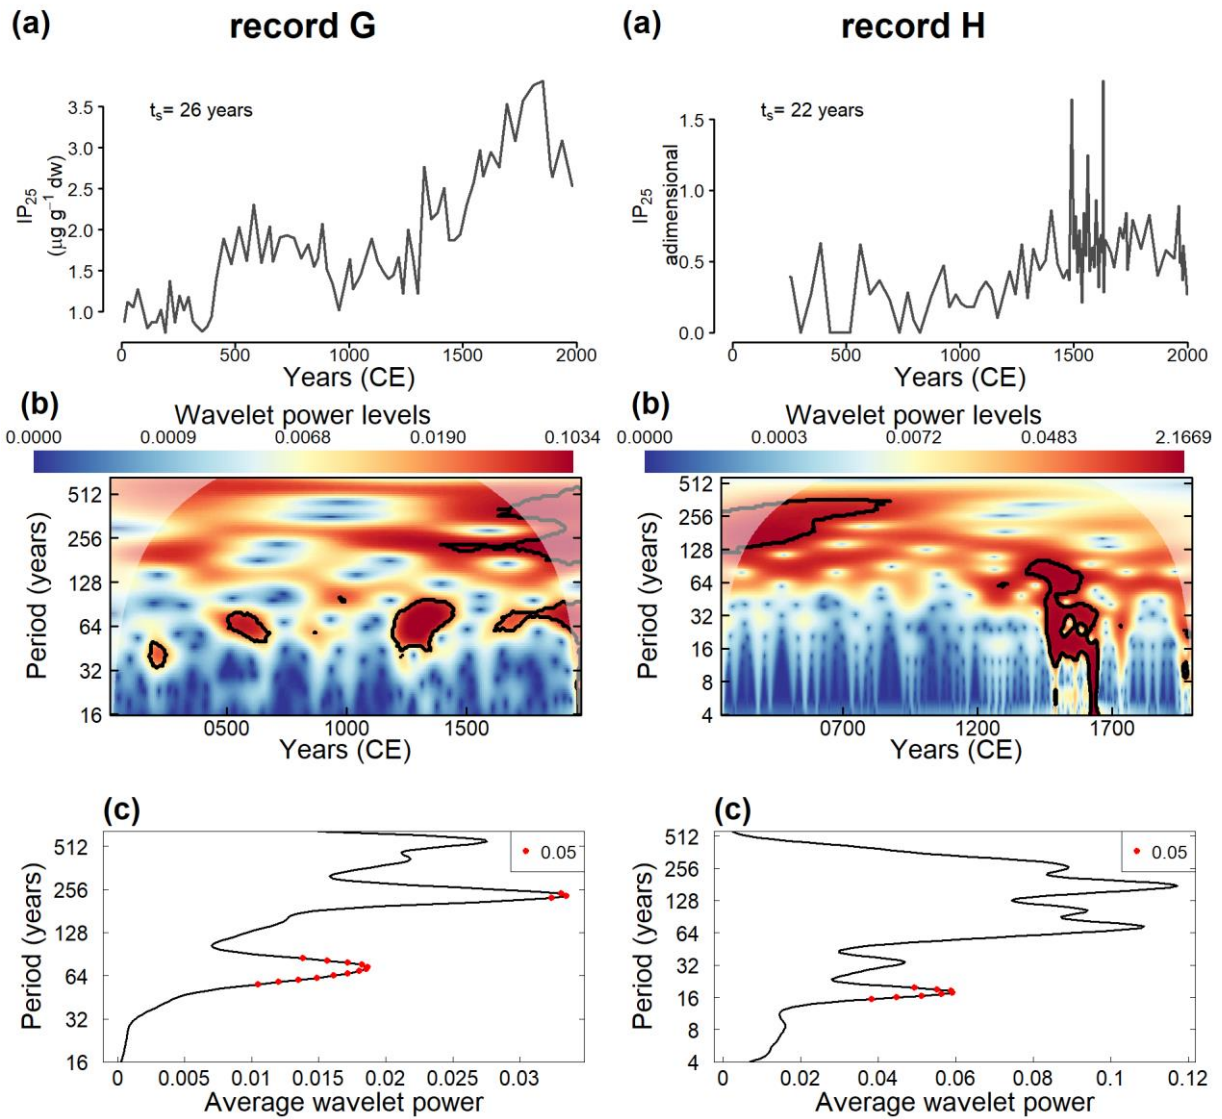

70 **Figure S11. Wavelet analysis of sea ice reconstructions from records G and H. (a) Original time series with the average resolution. (b) Wavelet power spectrum and (c) global wavelet of the normalized signal on the time-frequency domain. Marked regions on the wavelet spectrum indicate significant power to a 95% confidence interval. The areas under the cone of influence show where edge effects are important.**

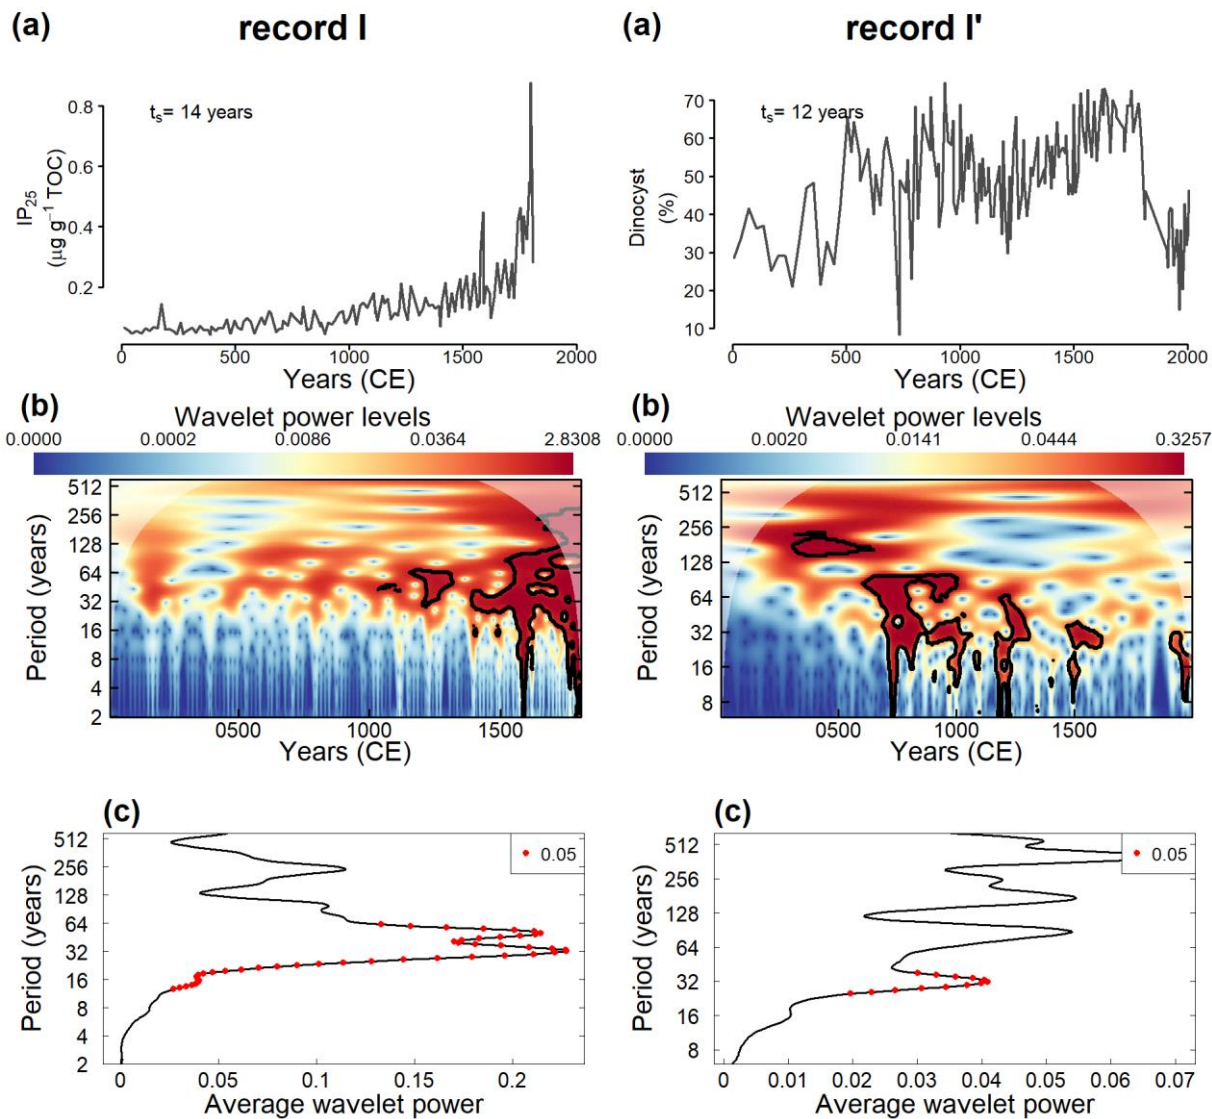

75 **Figure S12.** Wavelet analysis of sea ice reconstructions from records I and I'. (a) Original time series with the average resolution. (b) Wavelet power spectrum and (c) global wavelet of the normalized signal on the time-frequency domain. Marked regions on the wavelet spectrum indicate significant power to a 95% confidence interval. The areas under the cone of influence show where edge effects are important.

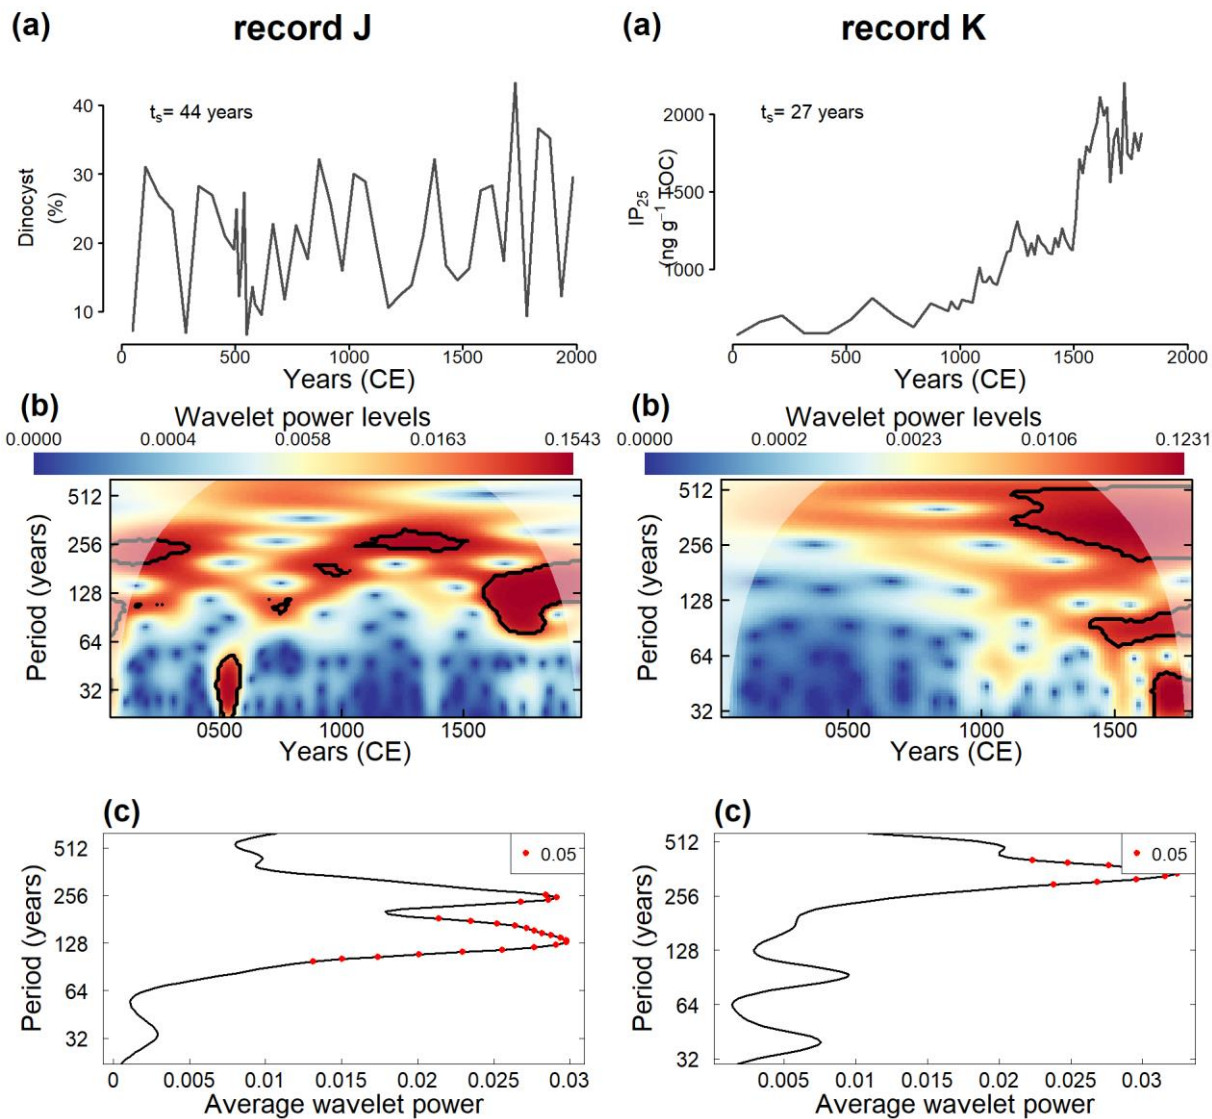

80

**Figure S13. Wavelet analysis of sea ice reconstructions from records J and K. (a) Original time series with the average resolution. (b) Wavelet power spectrum and (c) global wavelet of the normalized signal on the time-frequency domain. Marked regions on the wavelet spectrum indicate significant power to a 95% confidence interval. The areas under the cone of influence show where edge effects are important.**

85

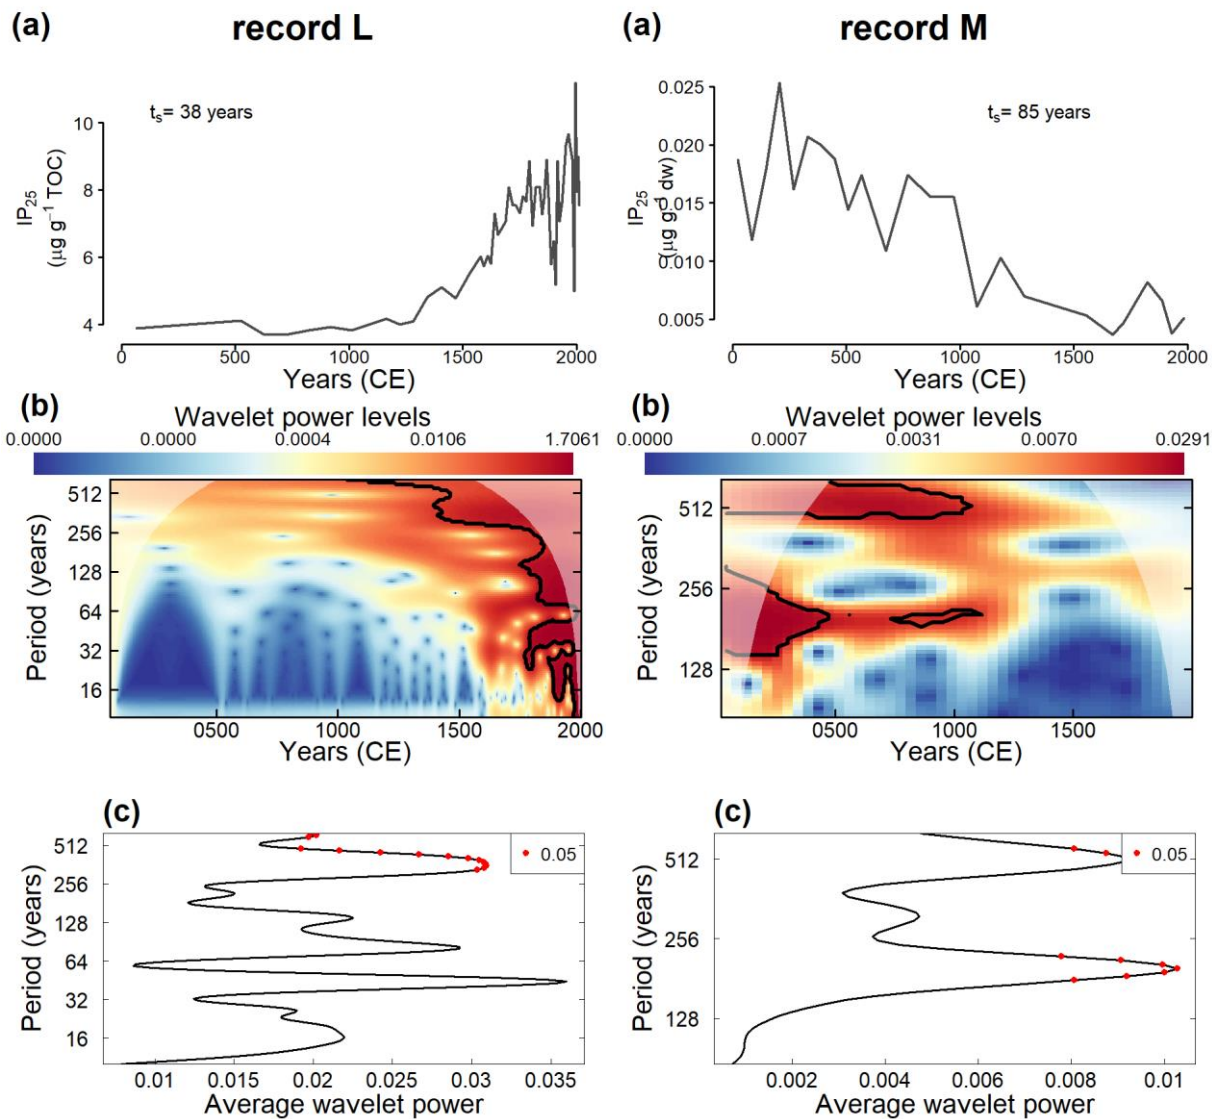

**Figure S14. Wavelet analysis of sea ice reconstructions from records L and M. (a) Original time series with the average resolution. (b) Wavelet power spectrum and (c) global wavelet of the normalized signal on the time-frequency domain. Marked regions on the wavelet spectrum indicate significant power to a 95% confidence interval. The areas under the cone of influence show where edge effects are important.**

90

## Tables

95 **Table S1. Values of the average composite of the standardized sea-ice reconstructions used in this study, considering the mean values after binning to 100-year time slices.**

| <b>Time slice</b> | <b>All records<br/>(n = 14)</b> | <b>G1<br/>(n = 7)</b> | <b>G2<br/>(n = 4)</b> | <b>G3<br/>(n = 3)</b> |
|-------------------|---------------------------------|-----------------------|-----------------------|-----------------------|
| 0 - 100           | -0.816                          | -1.031                | -1.060                | -0.219                |
| 100 - 200         | -0.659                          | -0.945                | -1.343                | 0.688                 |
| 200 - 300         | -0.724                          | -0.889                | -1.056                | 0.203                 |
| 300 - 400         | -0.483                          | -0.921                | -0.224                | 0.527                 |
| 400 - 500         | -0.514                          | -0.684                | -0.274                | 0.015                 |
| 500 - 600         | -0.394                          | -0.560                | -0.067                | -0.161                |
| 600 - 700         | -0.461                          | -0.648                | -0.175                | -0.312                |
| 700 - 800         | -0.478                          | -0.697                | -0.246                | -0.279                |
| 800 - 900         | -0.168                          | -0.523                | 0.236                 | 0.126                 |
| 900 - 1000        | -0.164                          | -0.468                | 0.088                 | 0.106                 |
| 1000 - 1100       | -0.138                          | -0.217                | -0.021                | -0.088                |
| 1100 - 1200       | -0.133                          | -0.066                | 0.330                 | -0.632                |
| 1200 - 1300       | -0.017                          | -0.016                | 0.767                 | -0.591                |
| 1300 - 1400       | 0.281                           | 0.282                 | 0.751                 | 0.049                 |
| 1400 - 1500       | 0.395                           | 0.467                 | 1.064                 | -0.292                |
| 1500 - 1600       | 0.813                           | 1.206                 | 0.762                 | -0.050                |
| 1600 - 1700       | 1.086                           | 1.462                 | 0.758                 | 0.068                 |
| 1700 - 1800       | 1.240                           | 1.987                 | -0.017                | 0.255                 |
| 1800 - 1900       | 1.281                           | 1.628                 | -0.475                | 0.537                 |
| 1900 - 2000       | 1.134                           | 1.557                 | -0.444                | -0.188                |



Table S2. Comparison between simulated sea-ice areas (in million km<sup>2</sup>) between the two models (CESM1 and MPI-ESM) and sea-ice extent (in million km<sup>2</sup>) from satellite data (obtained from the Integrated Climate Data Center, University of Hamburg - <https://www.fdr.uni-hamburg.de/record/8559>) for the Northern Hemisphere for annual, summer and winter areas, over the period between 1979 – 2000 CE. For the complete names of the sea-ice areas, please check Doerr et al. (2021).

| Sea-ice area<br>(10 <sup>6</sup> km <sup>2</sup> ) between<br>1979-2000 |        | Northern Hemisphere |                        |                 |
|-------------------------------------------------------------------------|--------|---------------------|------------------------|-----------------|
|                                                                         |        | Minimum<br>area     | Annual<br>average area | Maximum<br>area |
| <b>CESM1</b>                                                            | Summer | 4.8                 | 6.0                    | 6.6             |
|                                                                         | Winter | 15.0                | 15.6                   | 16.2            |
| <b>MPI-ESM</b>                                                          | Summer | 3.6                 | 4.2                    | 4.8             |
|                                                                         | Winter | 14.1                | 14.6                   | 15.1            |
| <b>HadISST_orig</b>                                                     | Summer | 5.8                 | 6.7                    | 7.5             |
|                                                                         | Winter | 15.3                | 15.7                   | 16.3            |
| <b>HadISST_nsidc</b>                                                    | Summer | 5.8                 | 6.7                    | 7.4             |
|                                                                         | Winter | 14.8                | 15.3                   | 15.8            |
| <b>nsidc_bt</b>                                                         | Summer | 5.6                 | 6.5                    | 7.3             |
|                                                                         | Winter | 14.4                | 14.9                   | 15.5            |
| <b>nsidc_nt</b>                                                         | Summer | 4.6                 | 5.3                    | 6.0             |
|                                                                         | Winter | 13.4                | 14.0                   | 14.5            |
| <b>osisaf</b>                                                           | Summer | 5.0                 | 5.7                    | 6.3             |
|                                                                         | Winter | 13.7                | 14.2                   | 14.7            |
| <b>walsh</b>                                                            | Summer | 5.5                 | 6.4                    | 7.2             |
|                                                                         | Winter | 14.7                | 15.3                   | 16.0            |

Doerr, J., Notz, D., and Kern, S.: UHH Sea Ice Area Product (Version 2019\_fv0.01) [Data set], <https://doi.org/http://doi.org/10.25592/uhhfdm.8559>, 2021.
